# Supplementary material
Source: MDPI journal article supplement (https://www.mdpi.com/2673-401X/3/1/2)

Electronic Supplementary Information for:

***De Novo* Synthesis of Bacteriochlorins Bearing Four Trideuteriomethyl Groups**

Haoyu Jing,<sup>1</sup> Qun Tang,<sup>2</sup> David F. Bocian,<sup>2,\*</sup> and Jonathan S. Lindsey<sup>1,\*</sup>

<sup>1</sup>Department of Chemistry  
North Carolina State University  
Raleigh, North Carolina 27695-8204

<sup>2</sup>Department of Chemistry  
University of California, Riverside  
Riverside, California 92521-0403

**Contents**

(1) NMR Spectral Data for Selected Compounds.

**Pages**

S2–S18

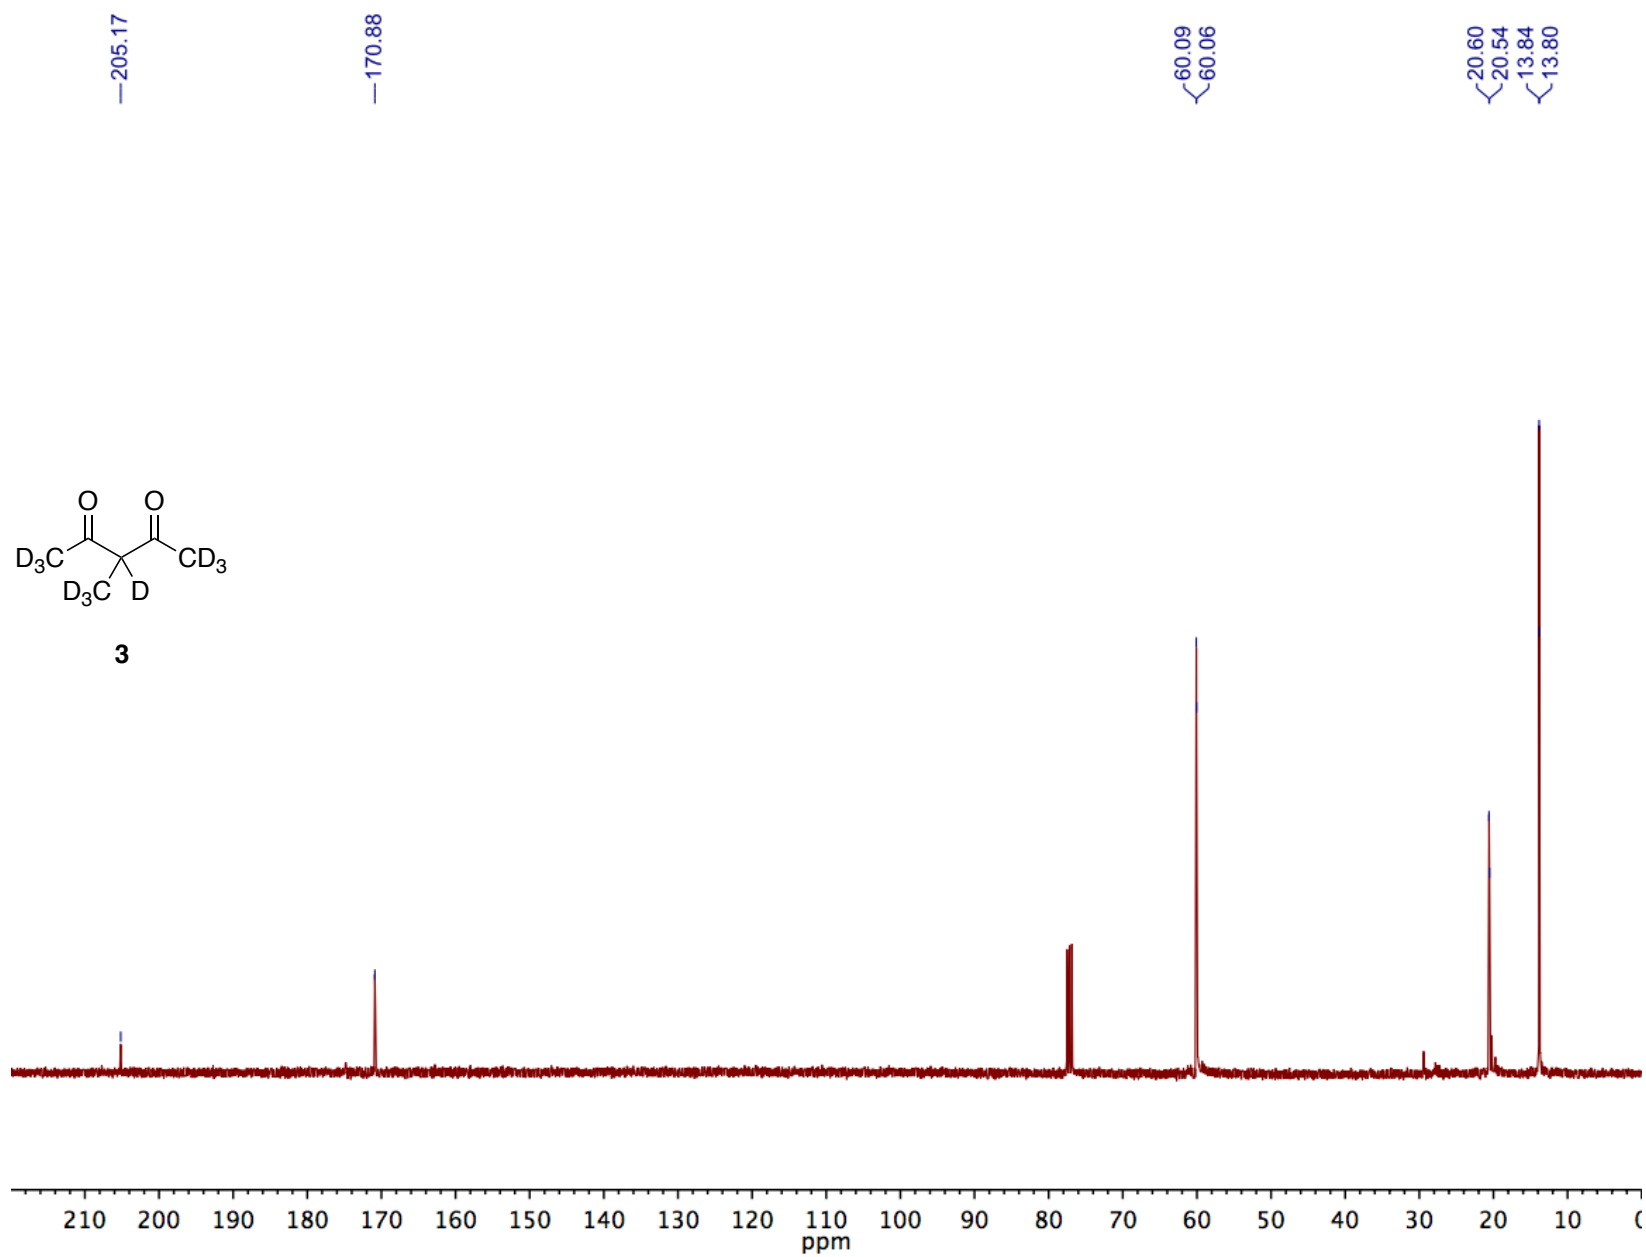

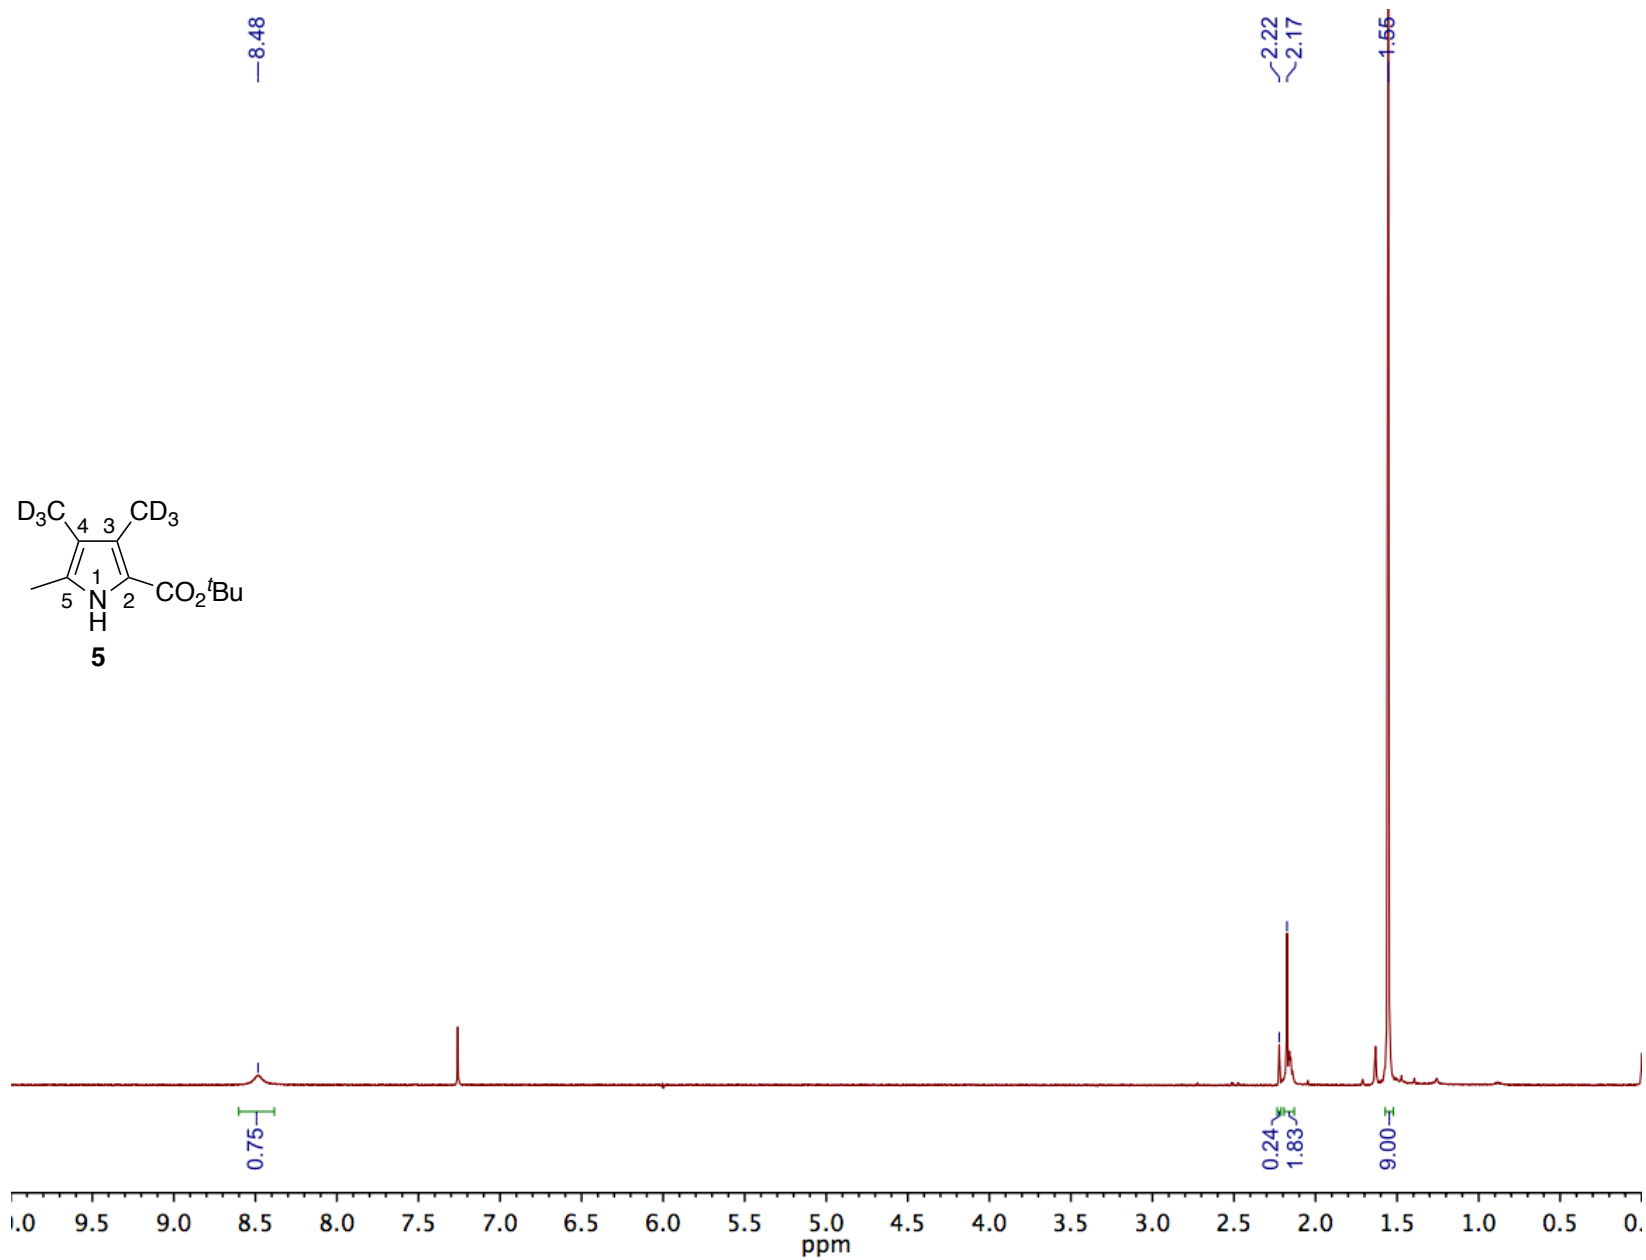

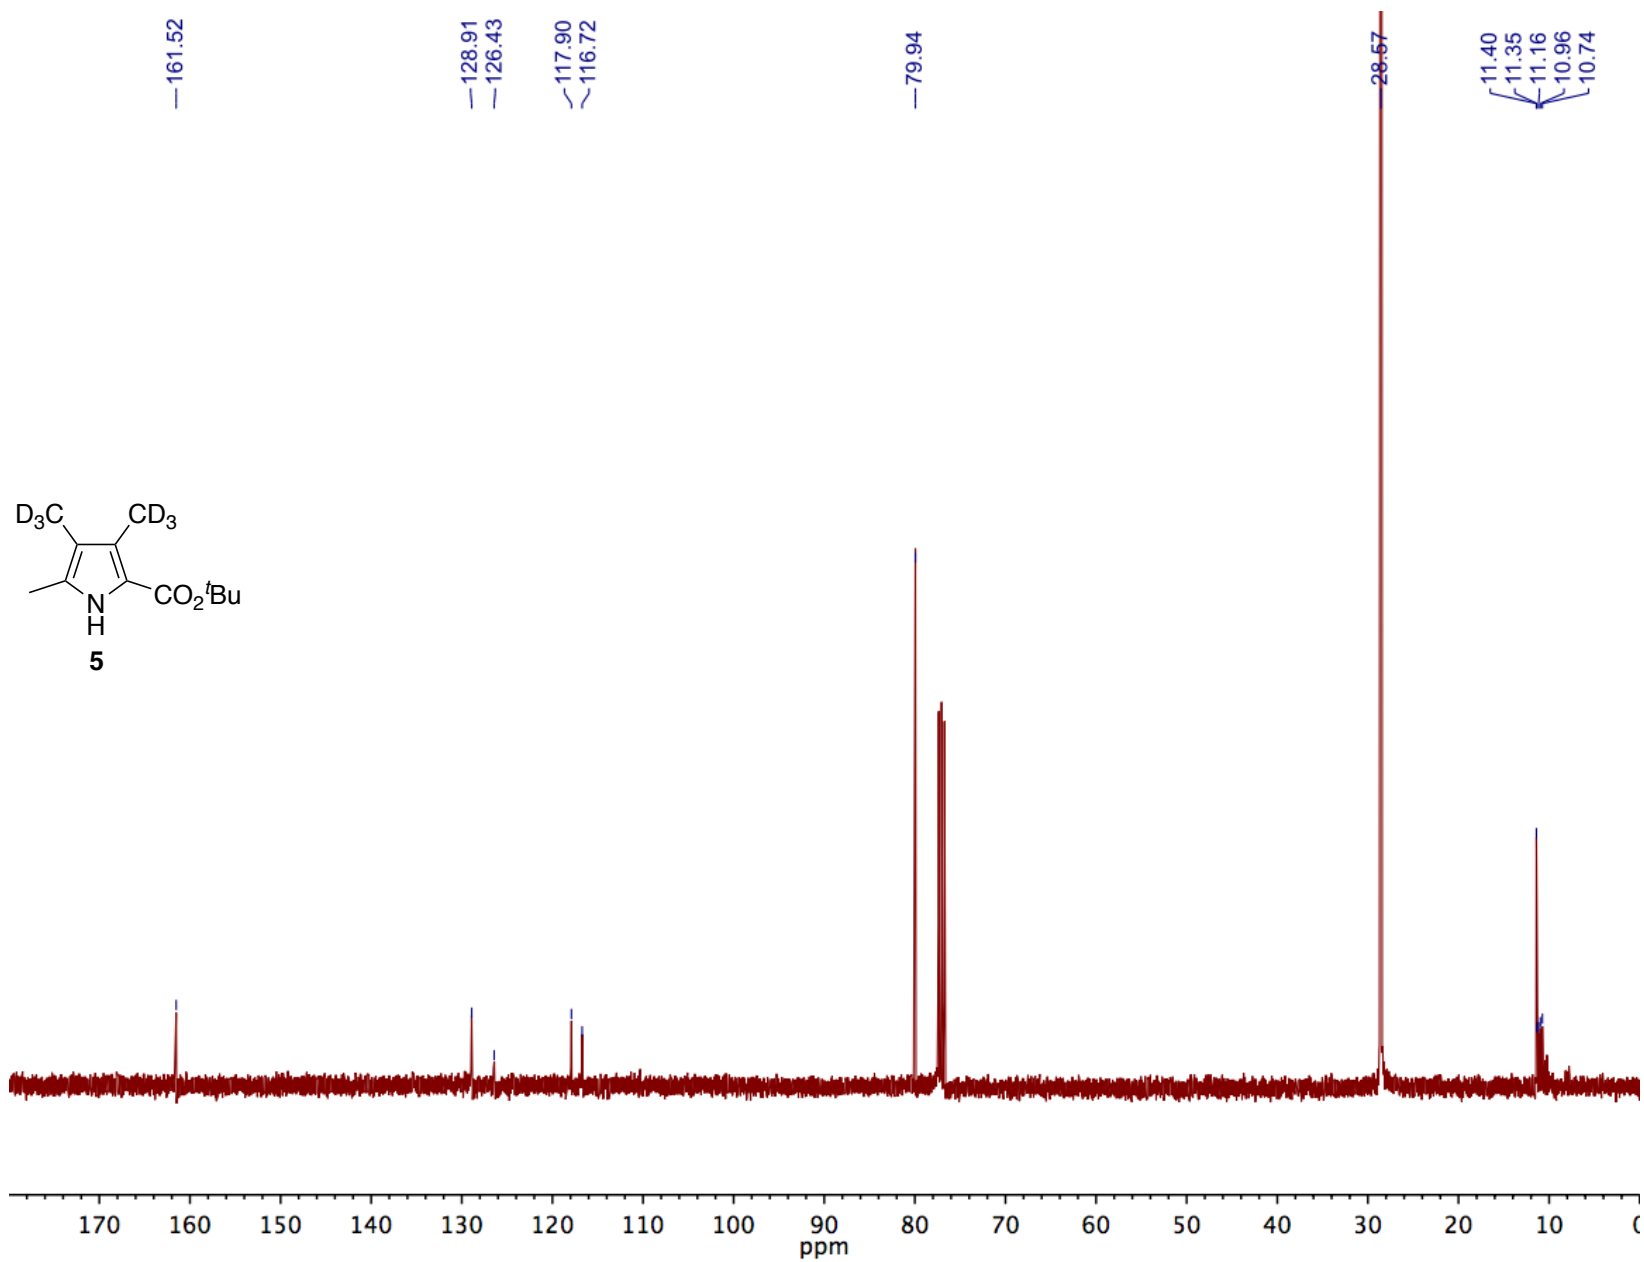

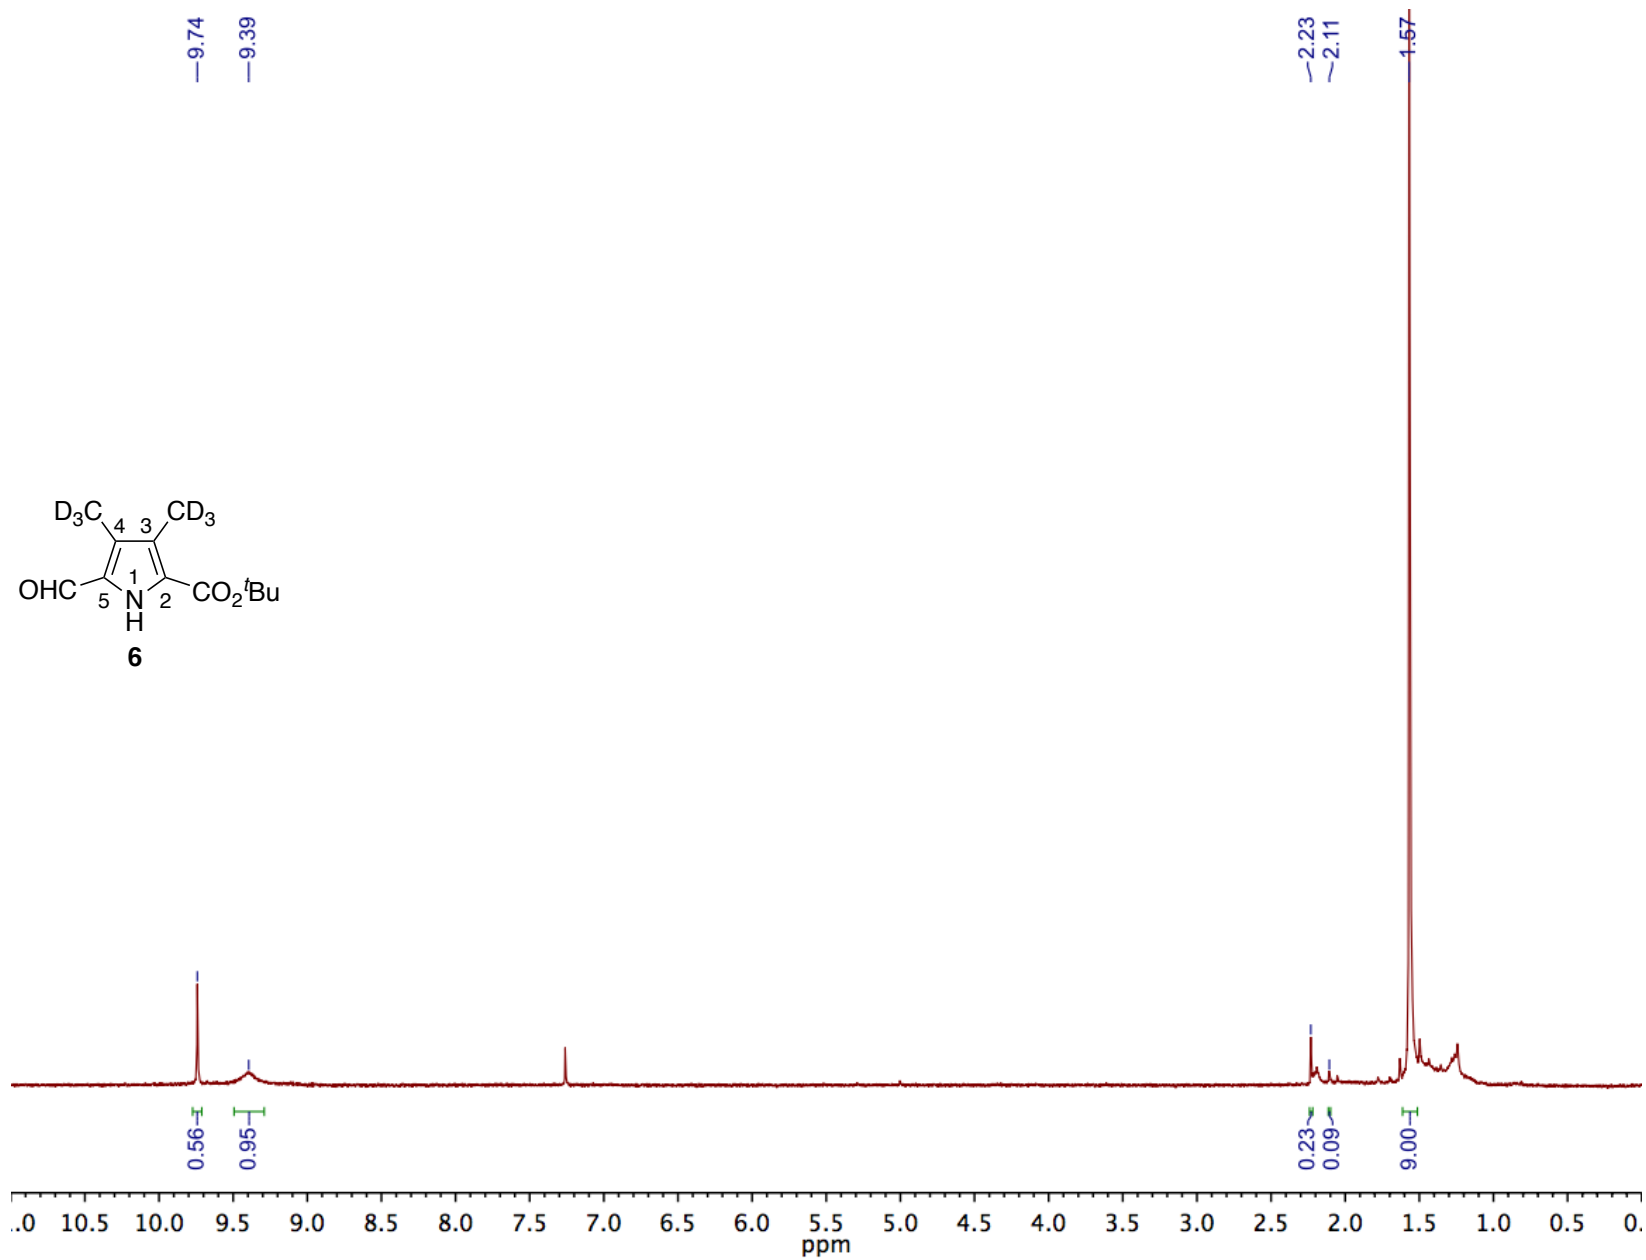

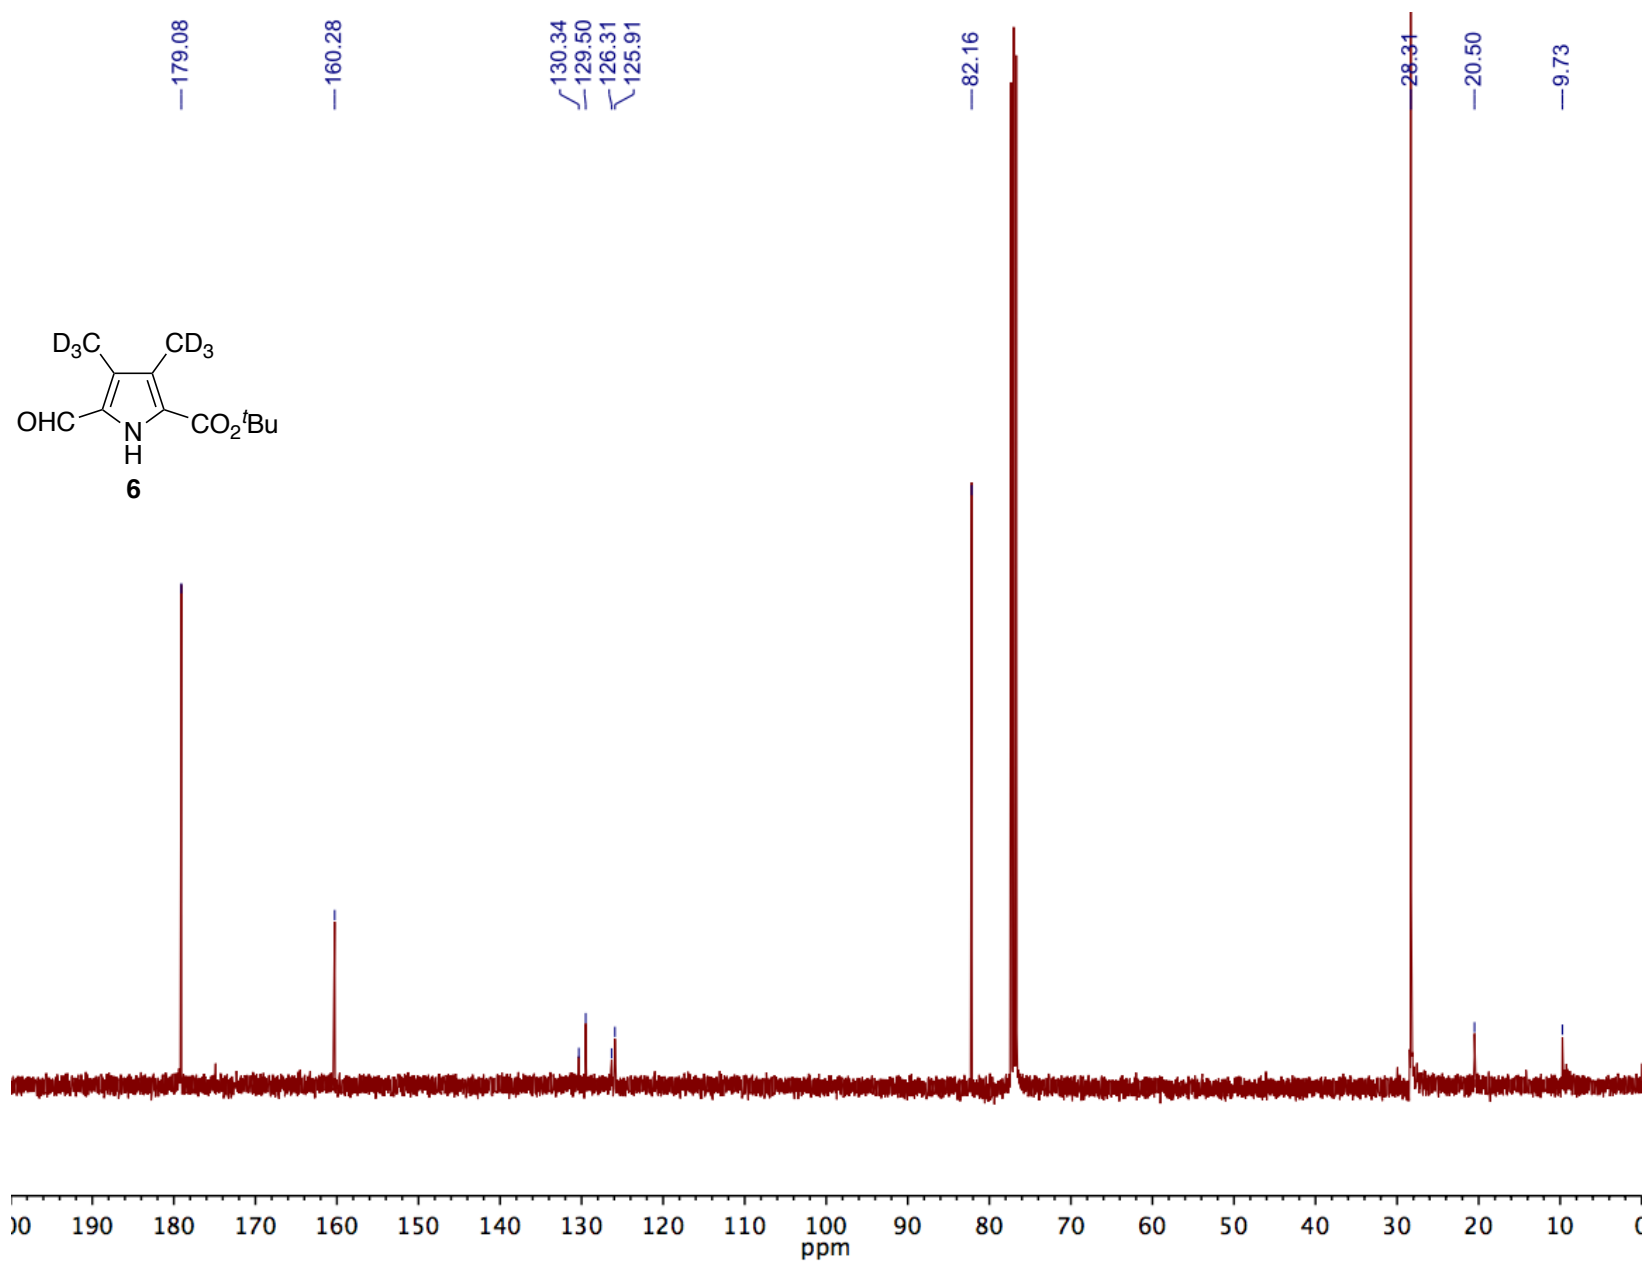

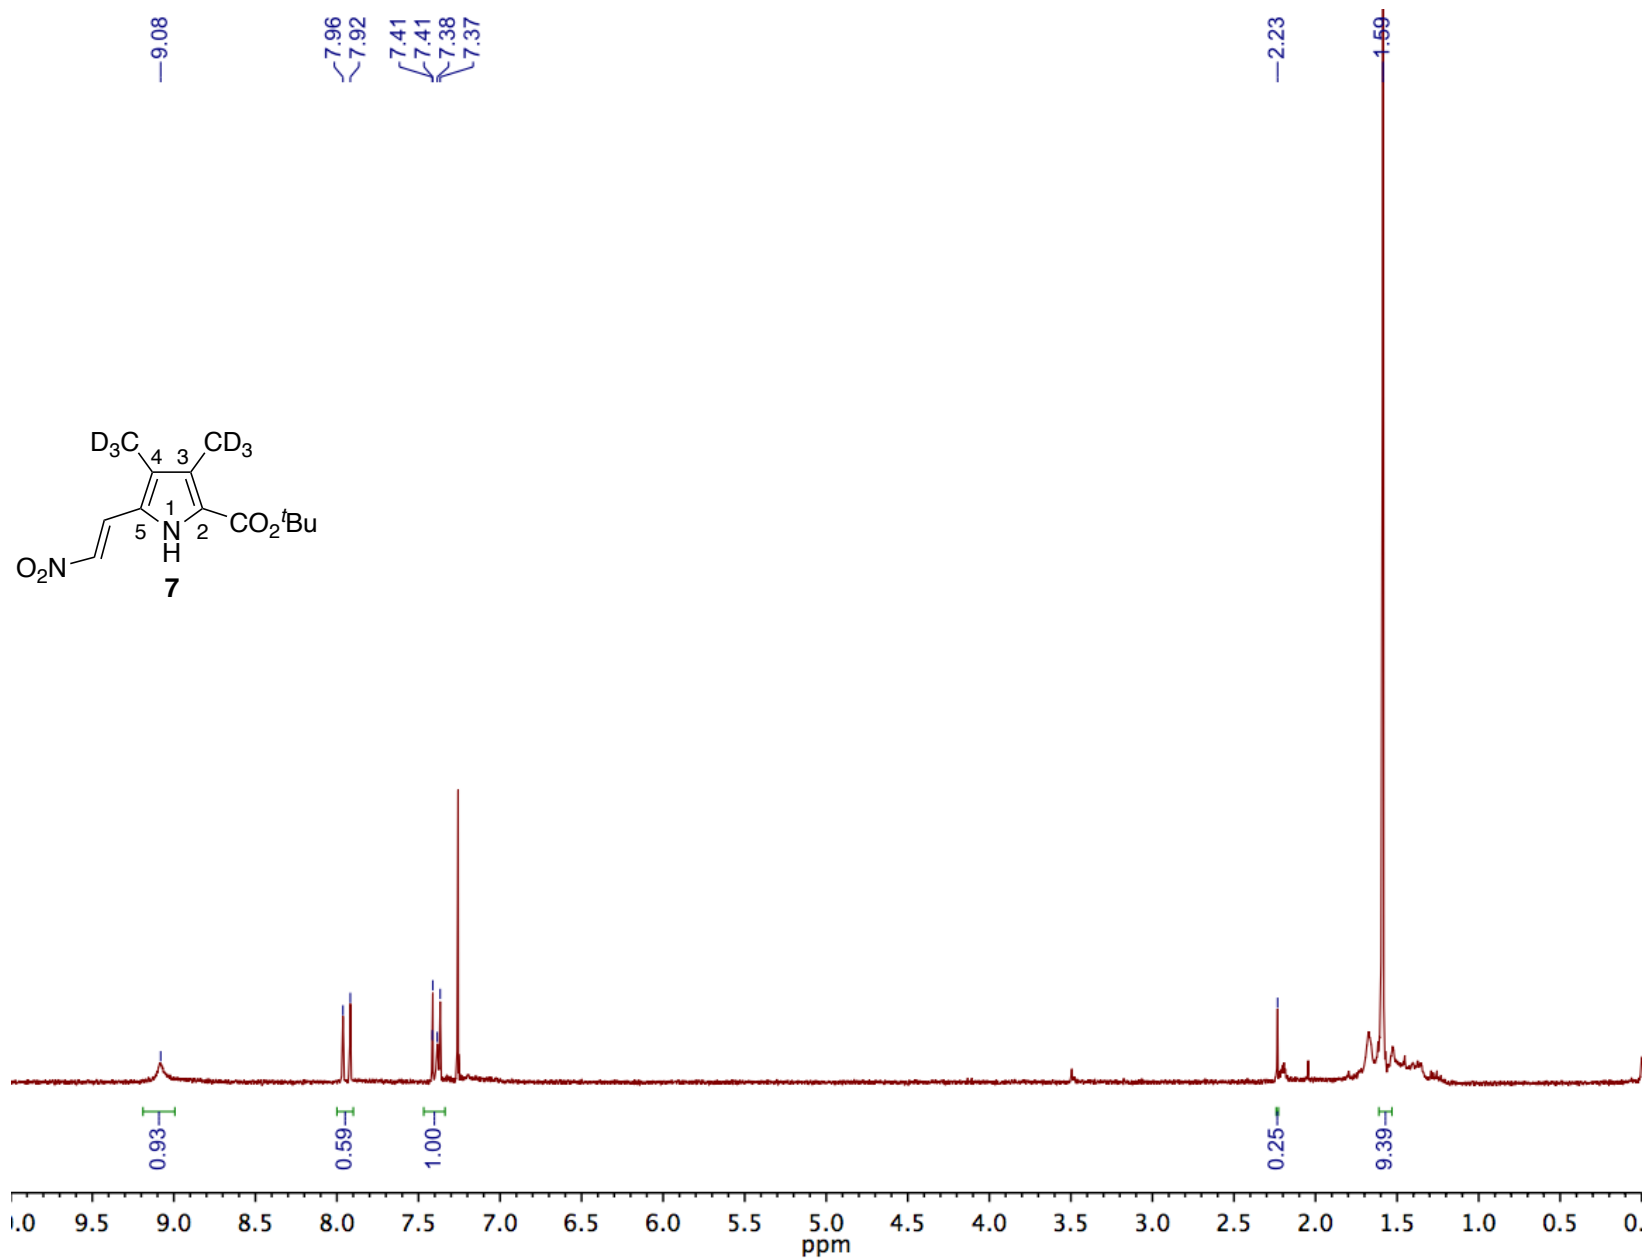

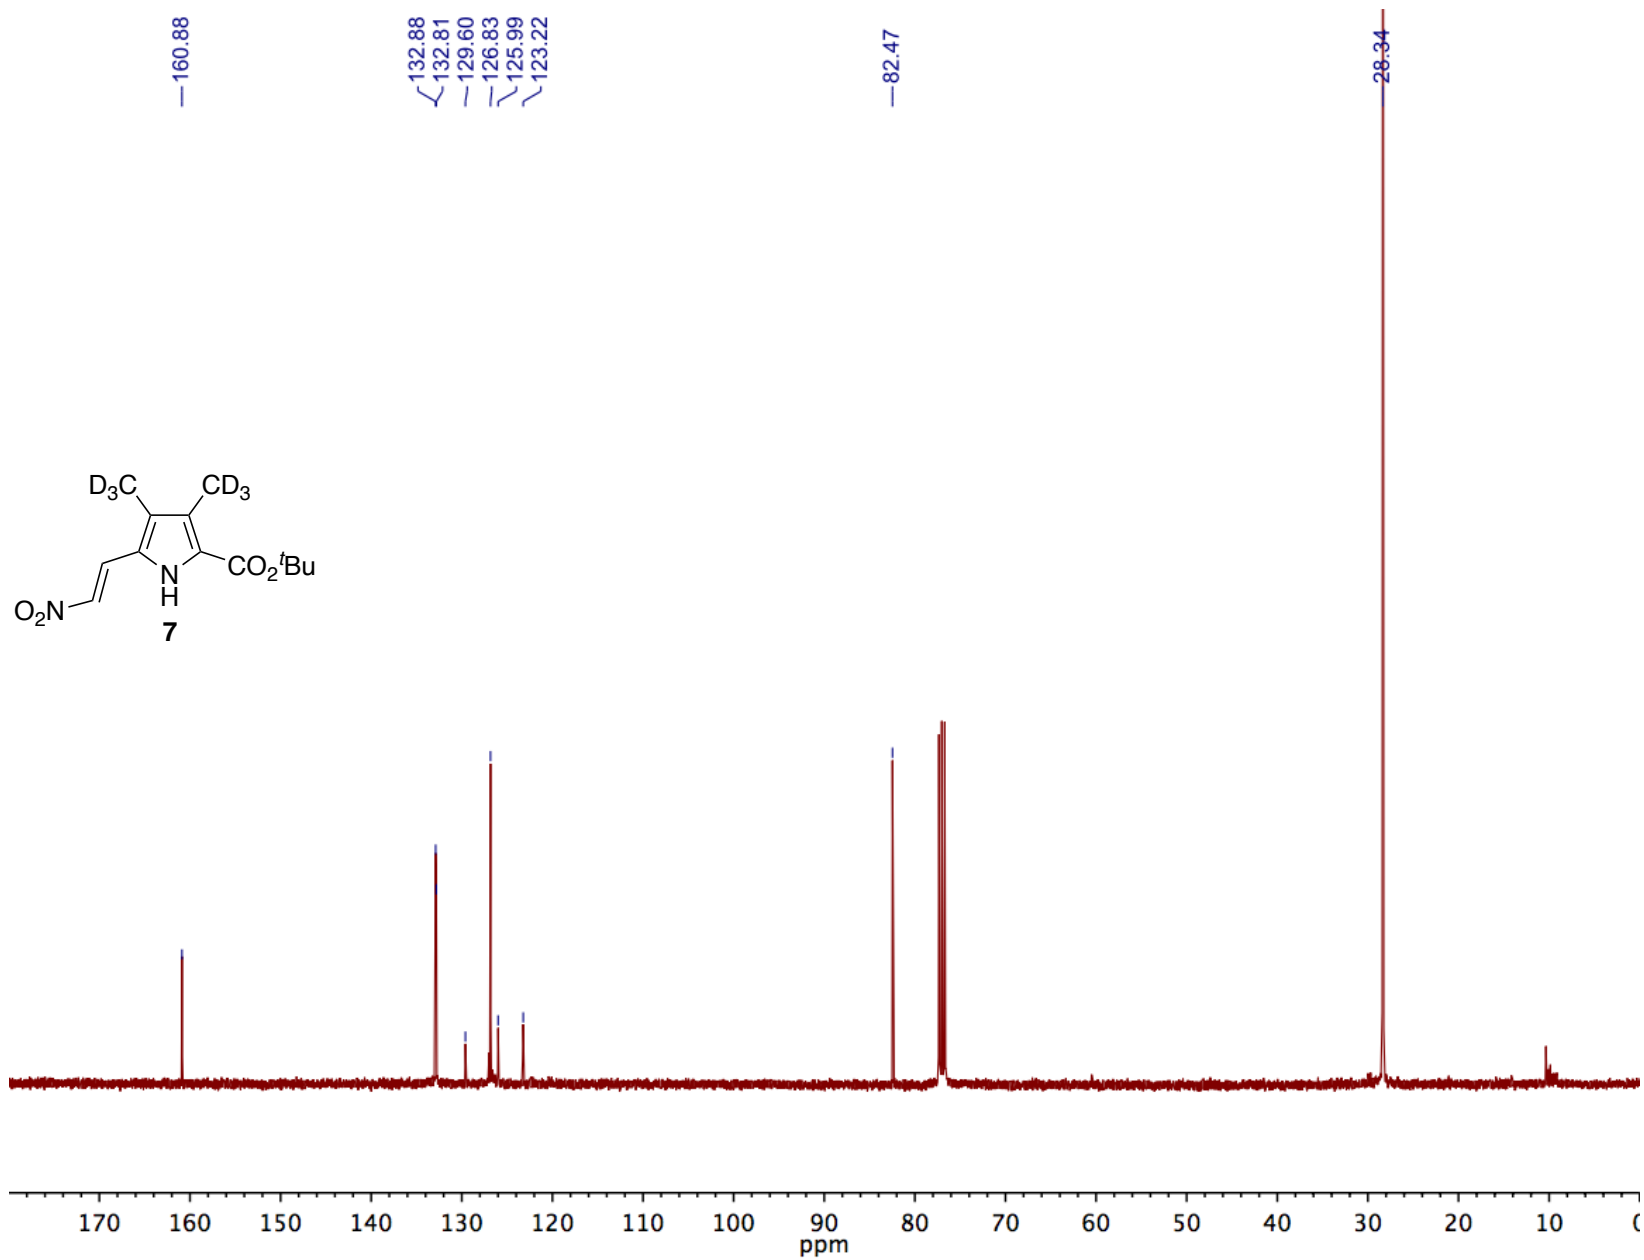



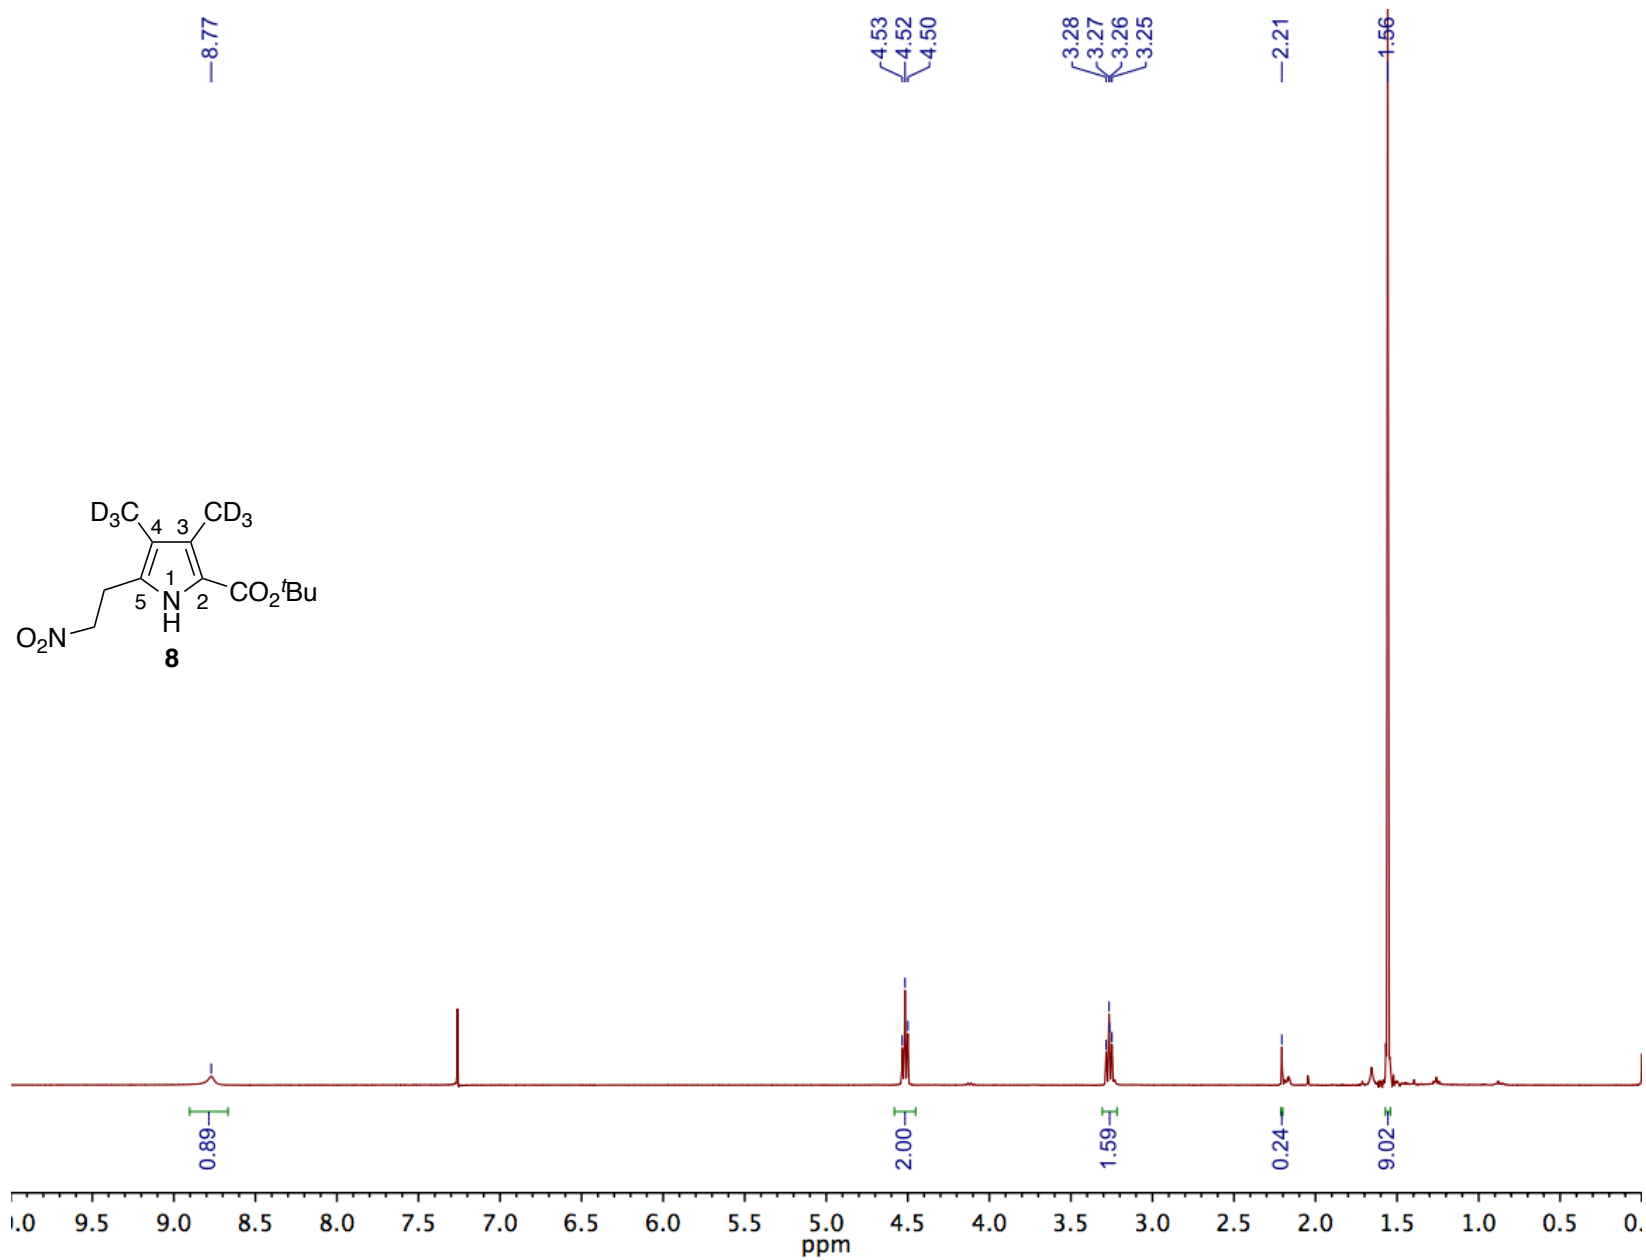

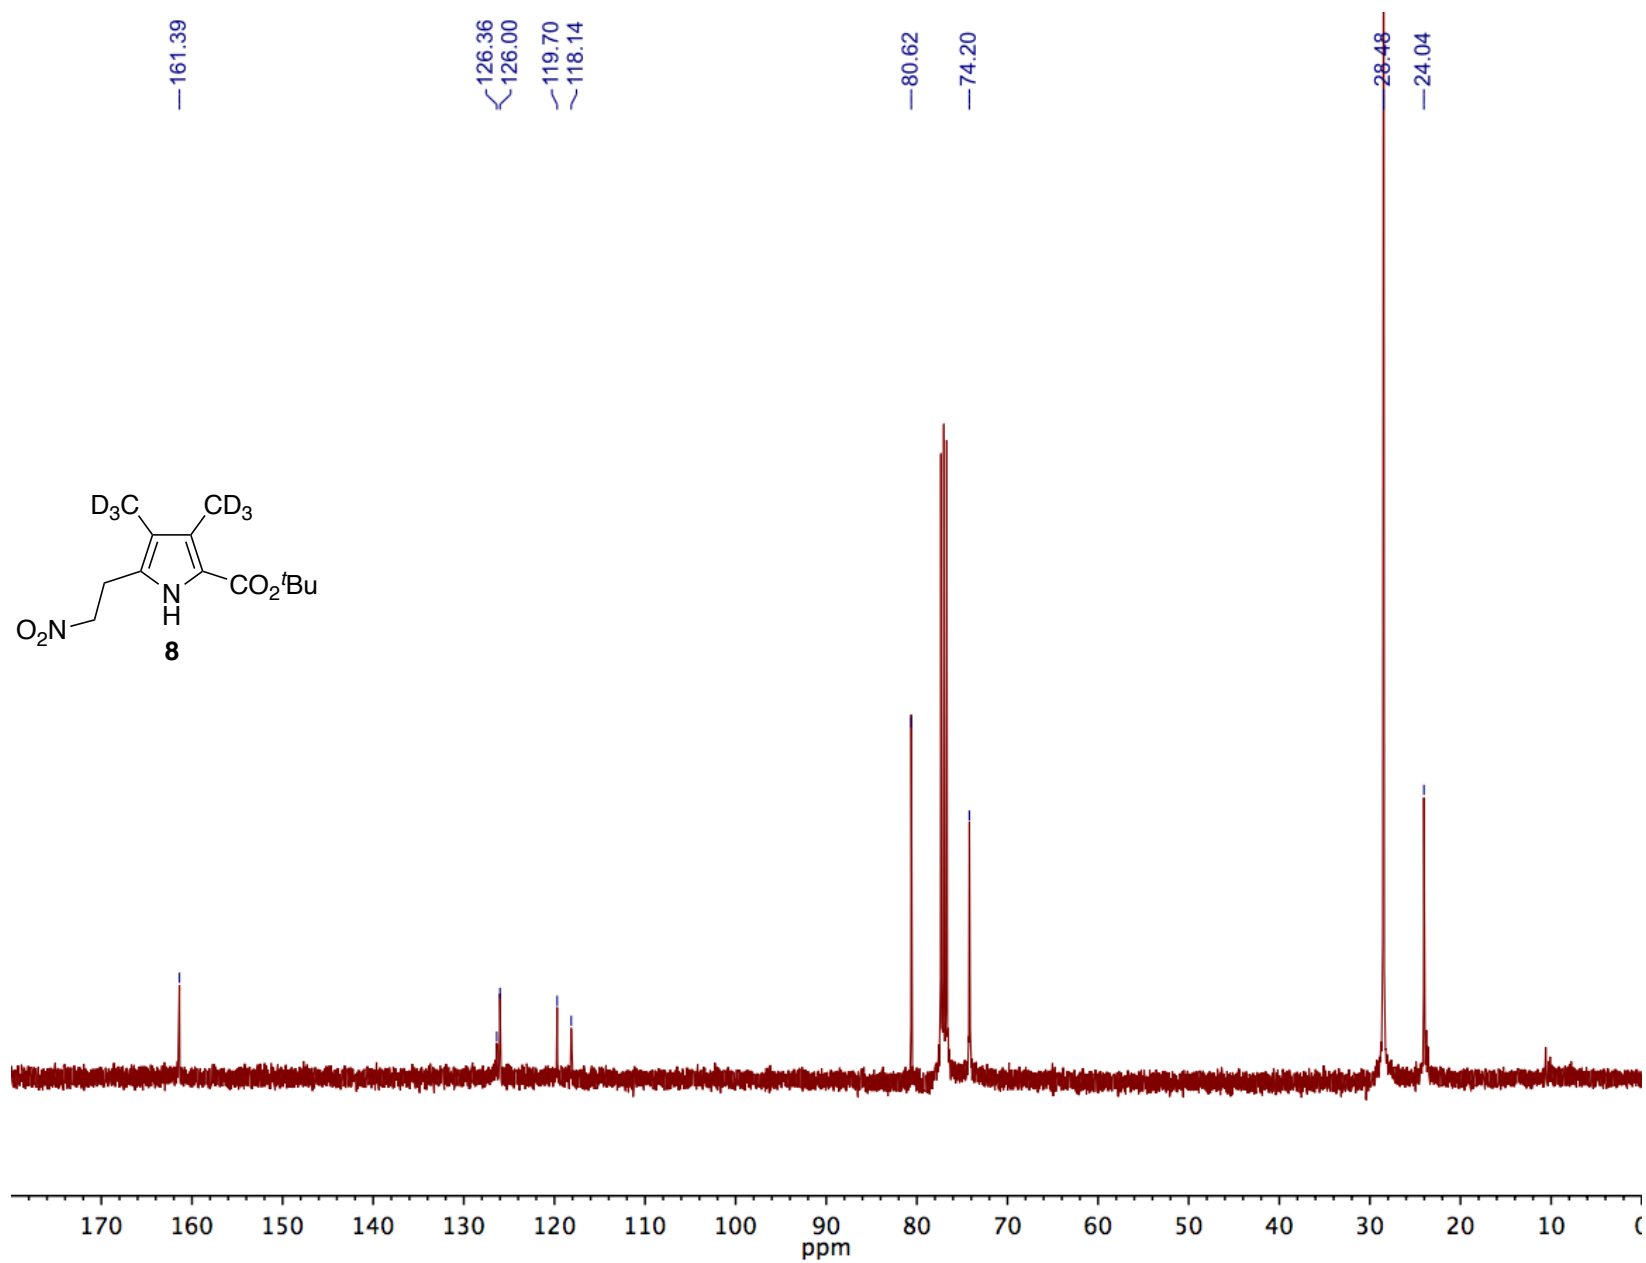

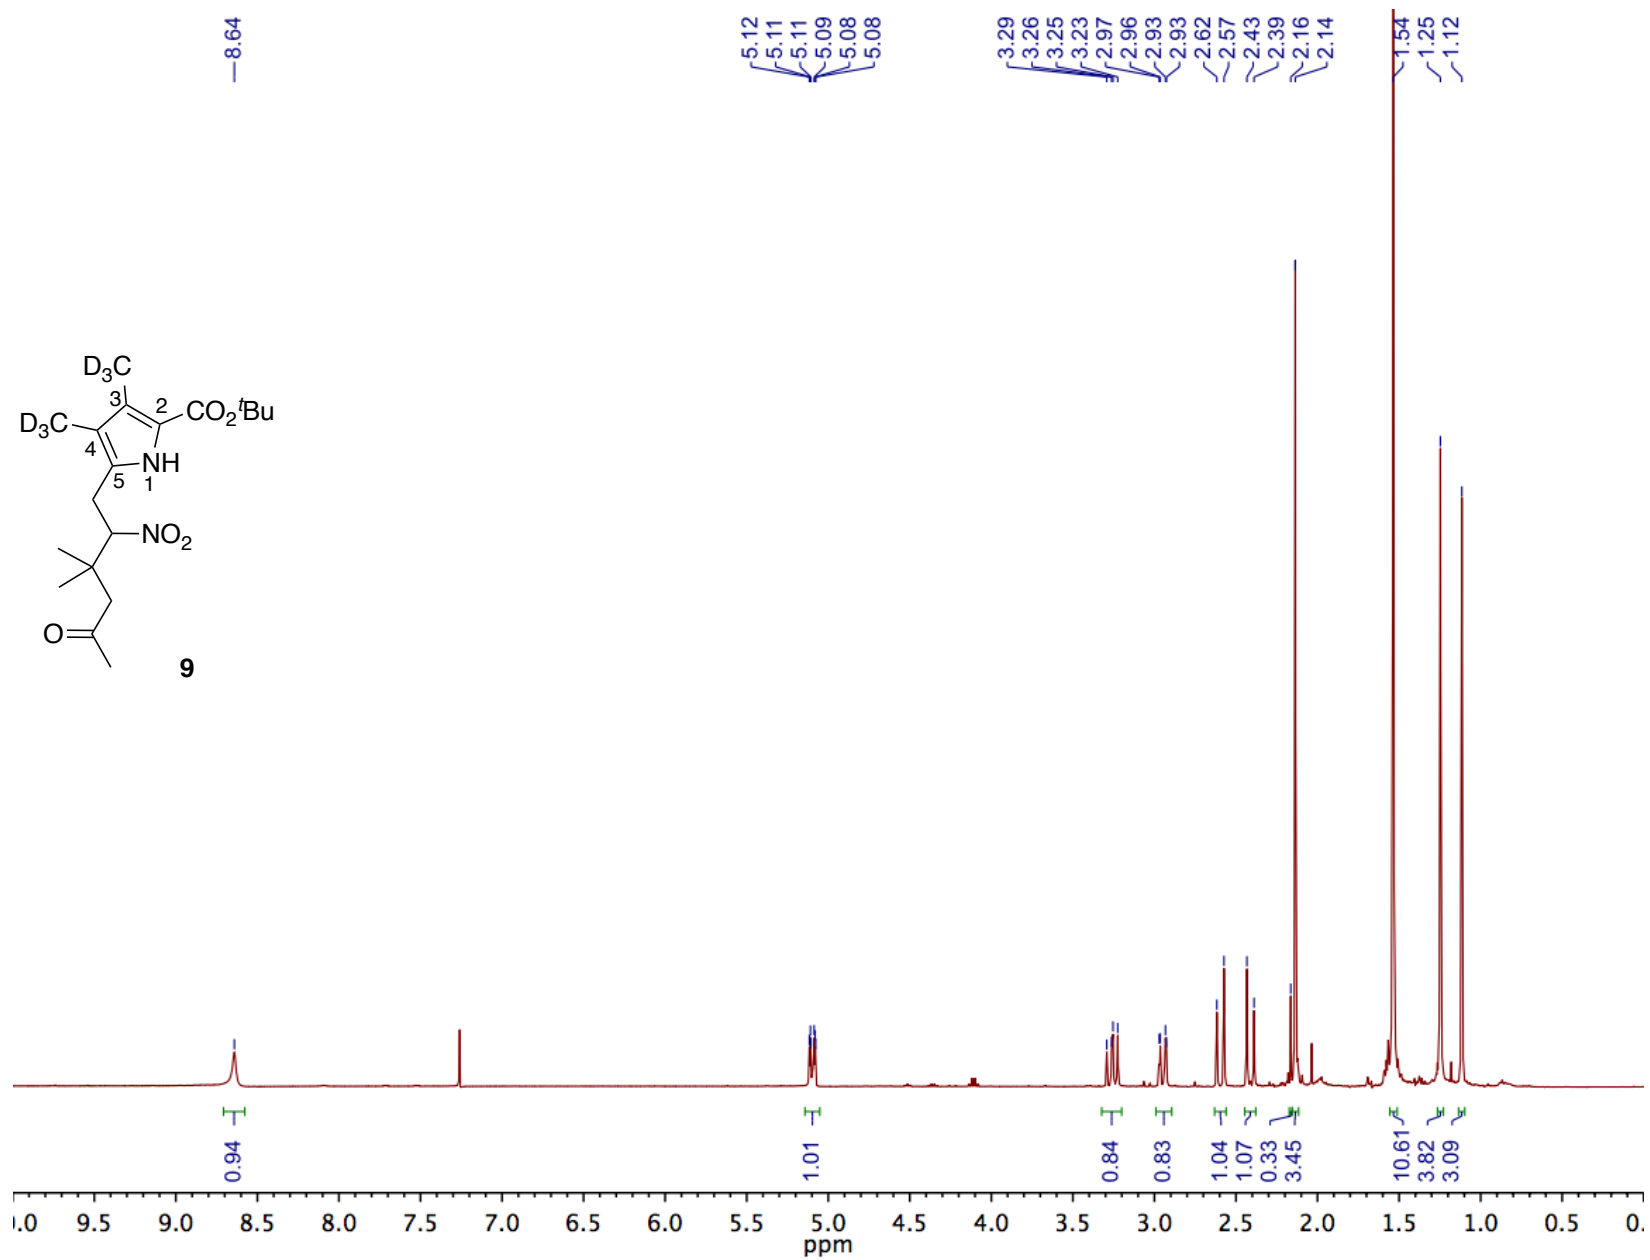

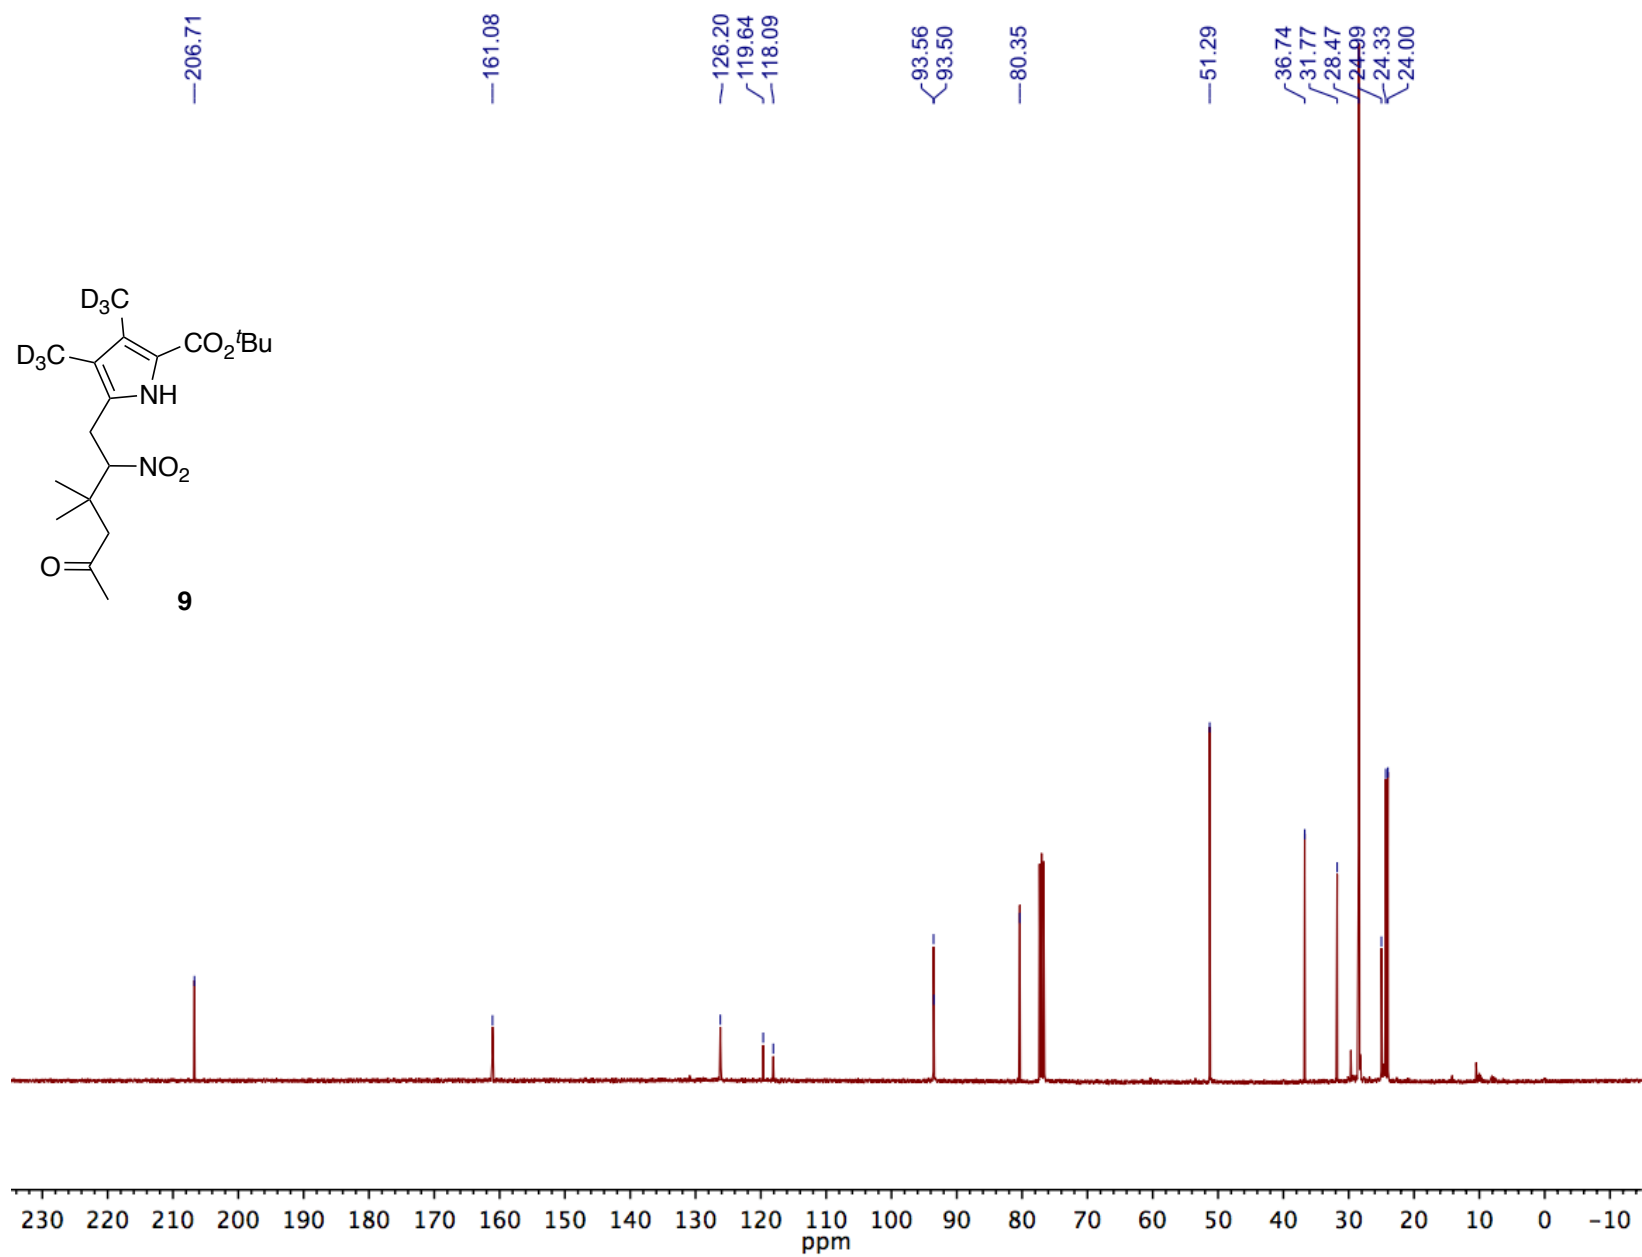

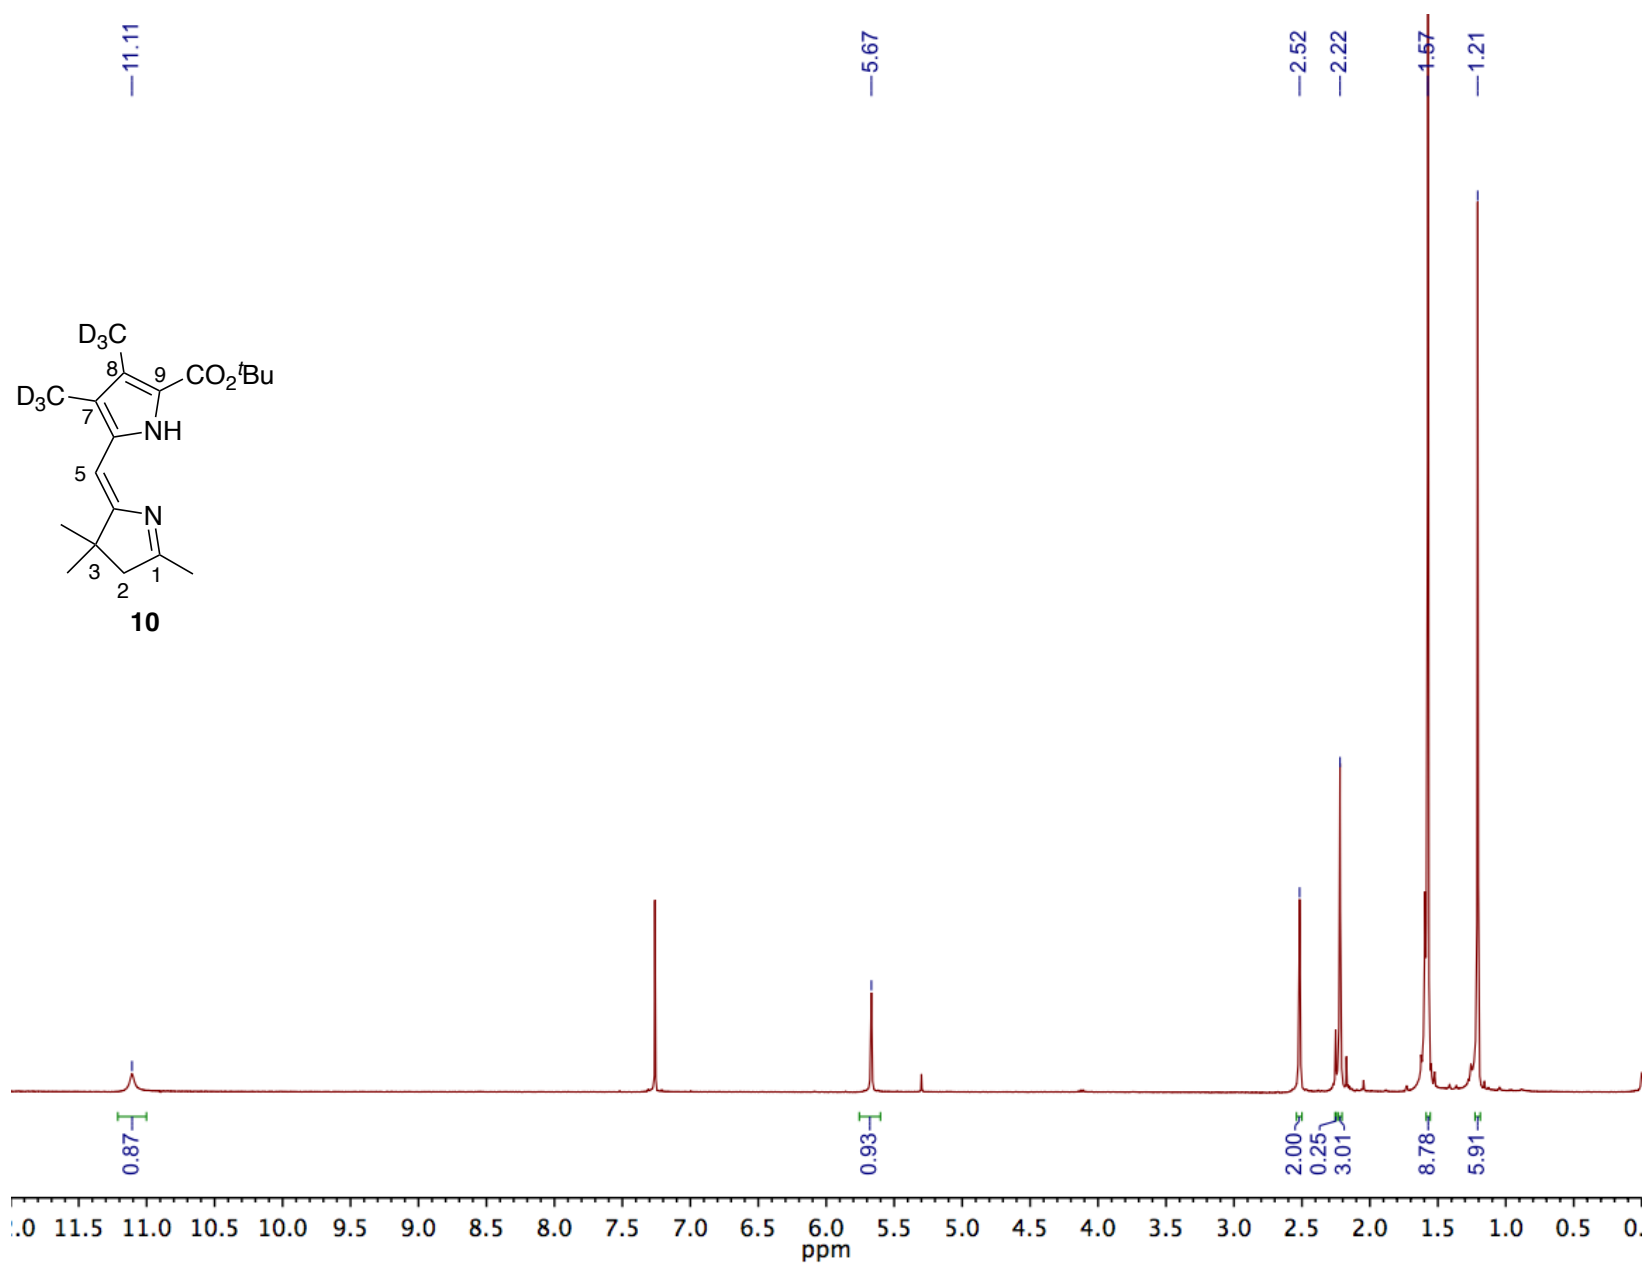

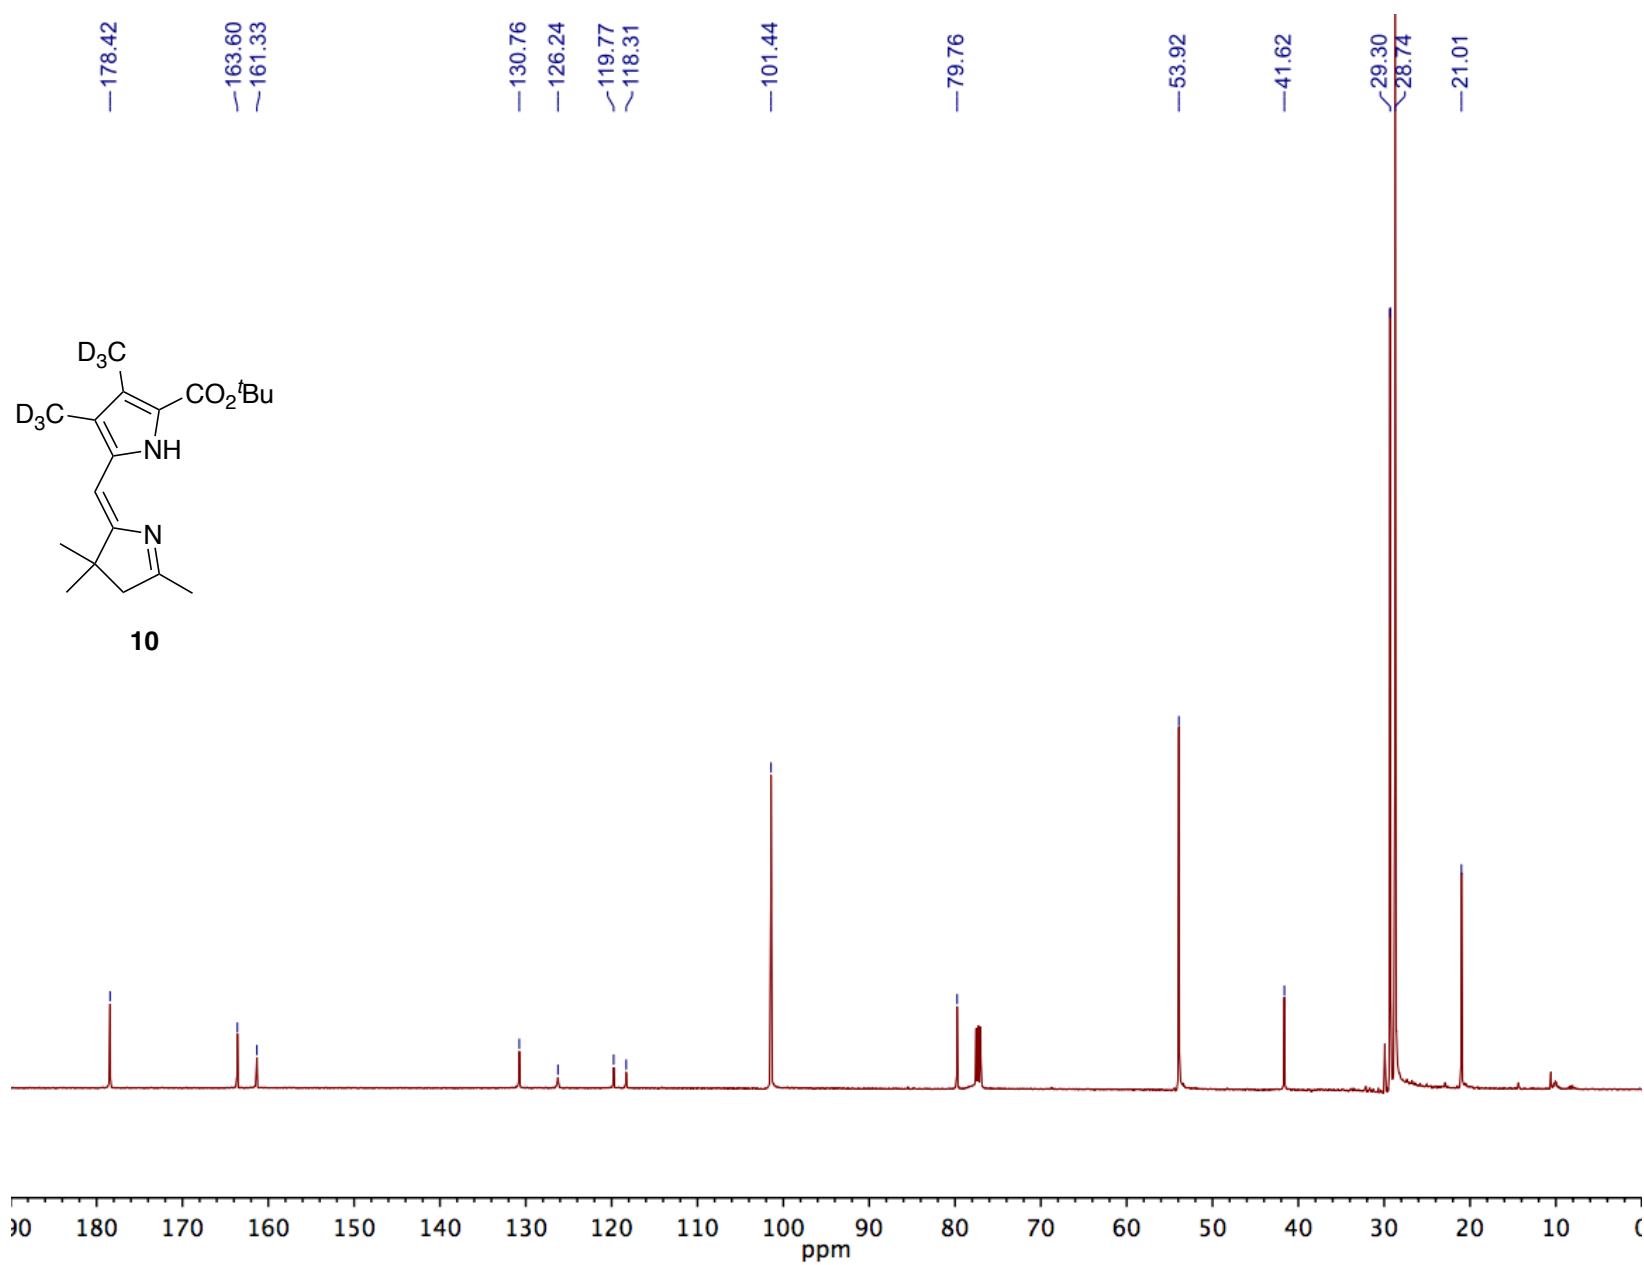

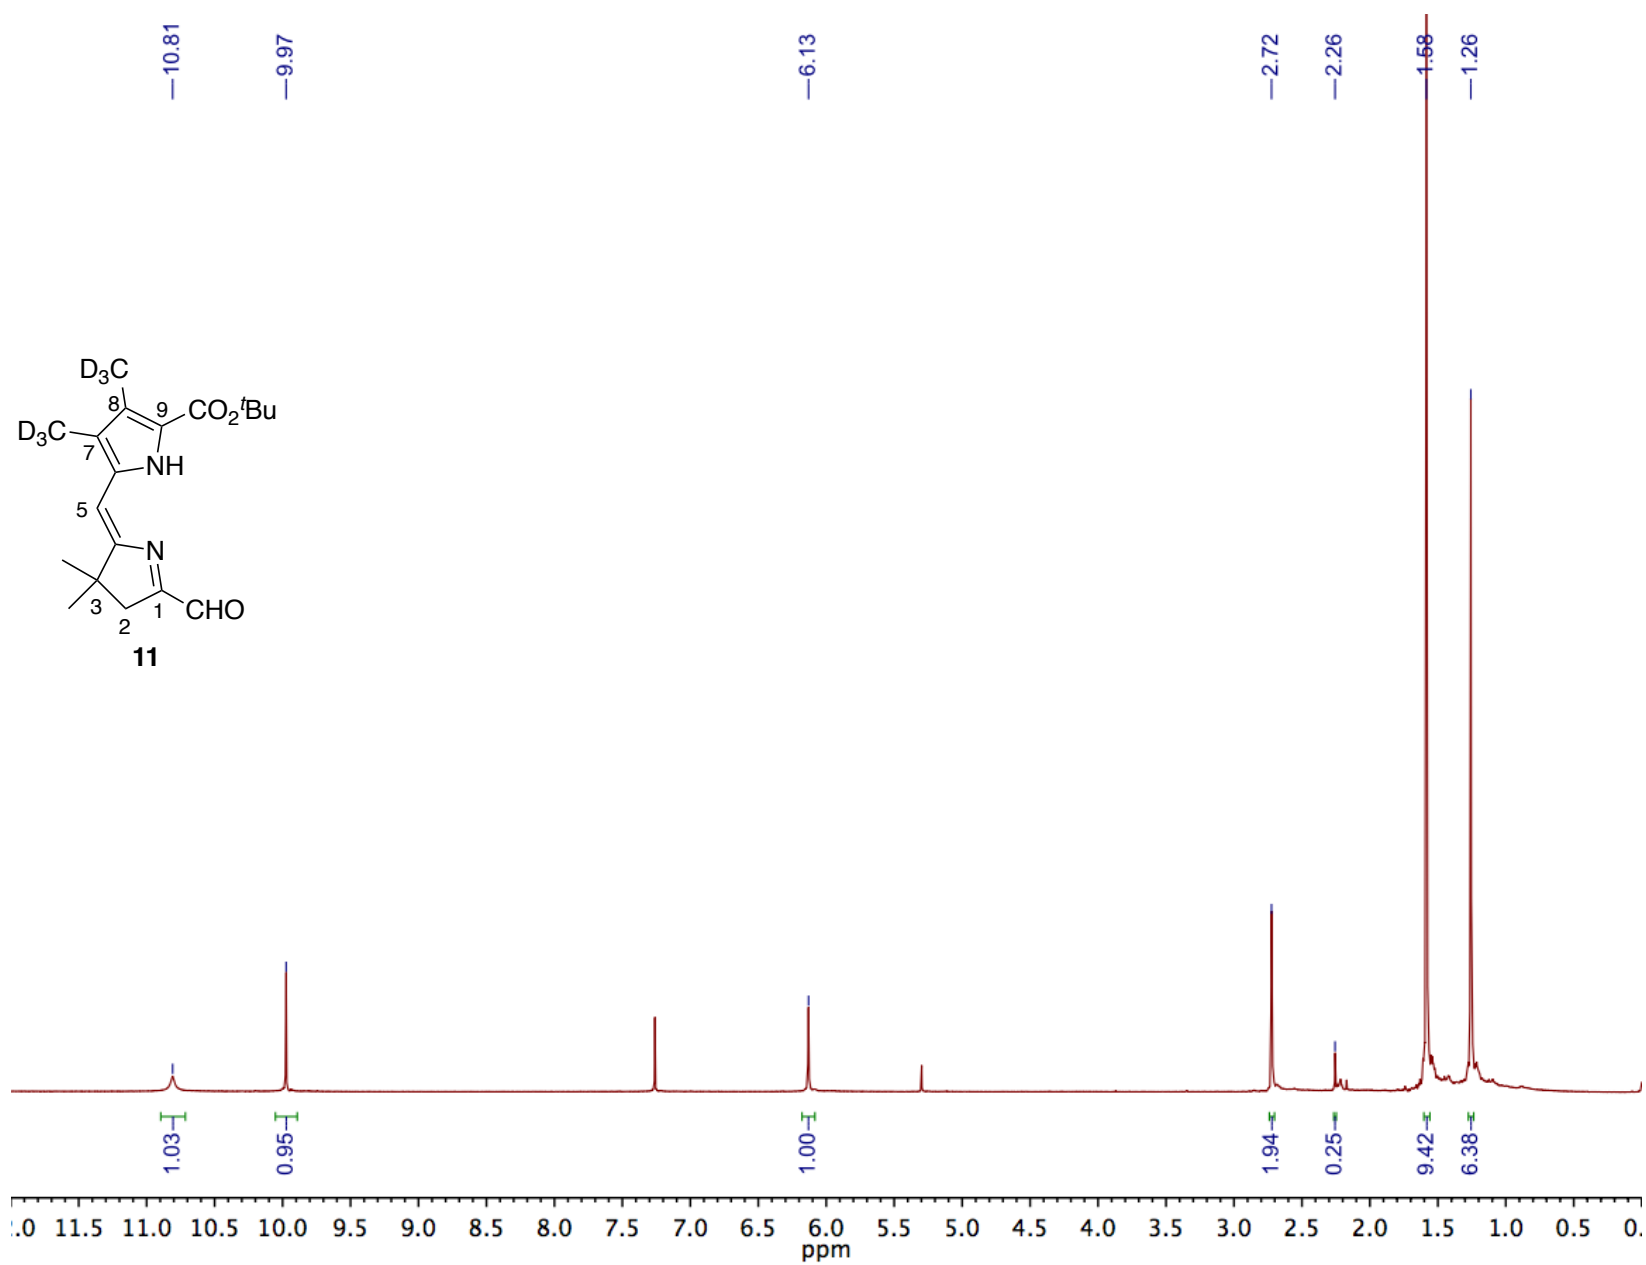

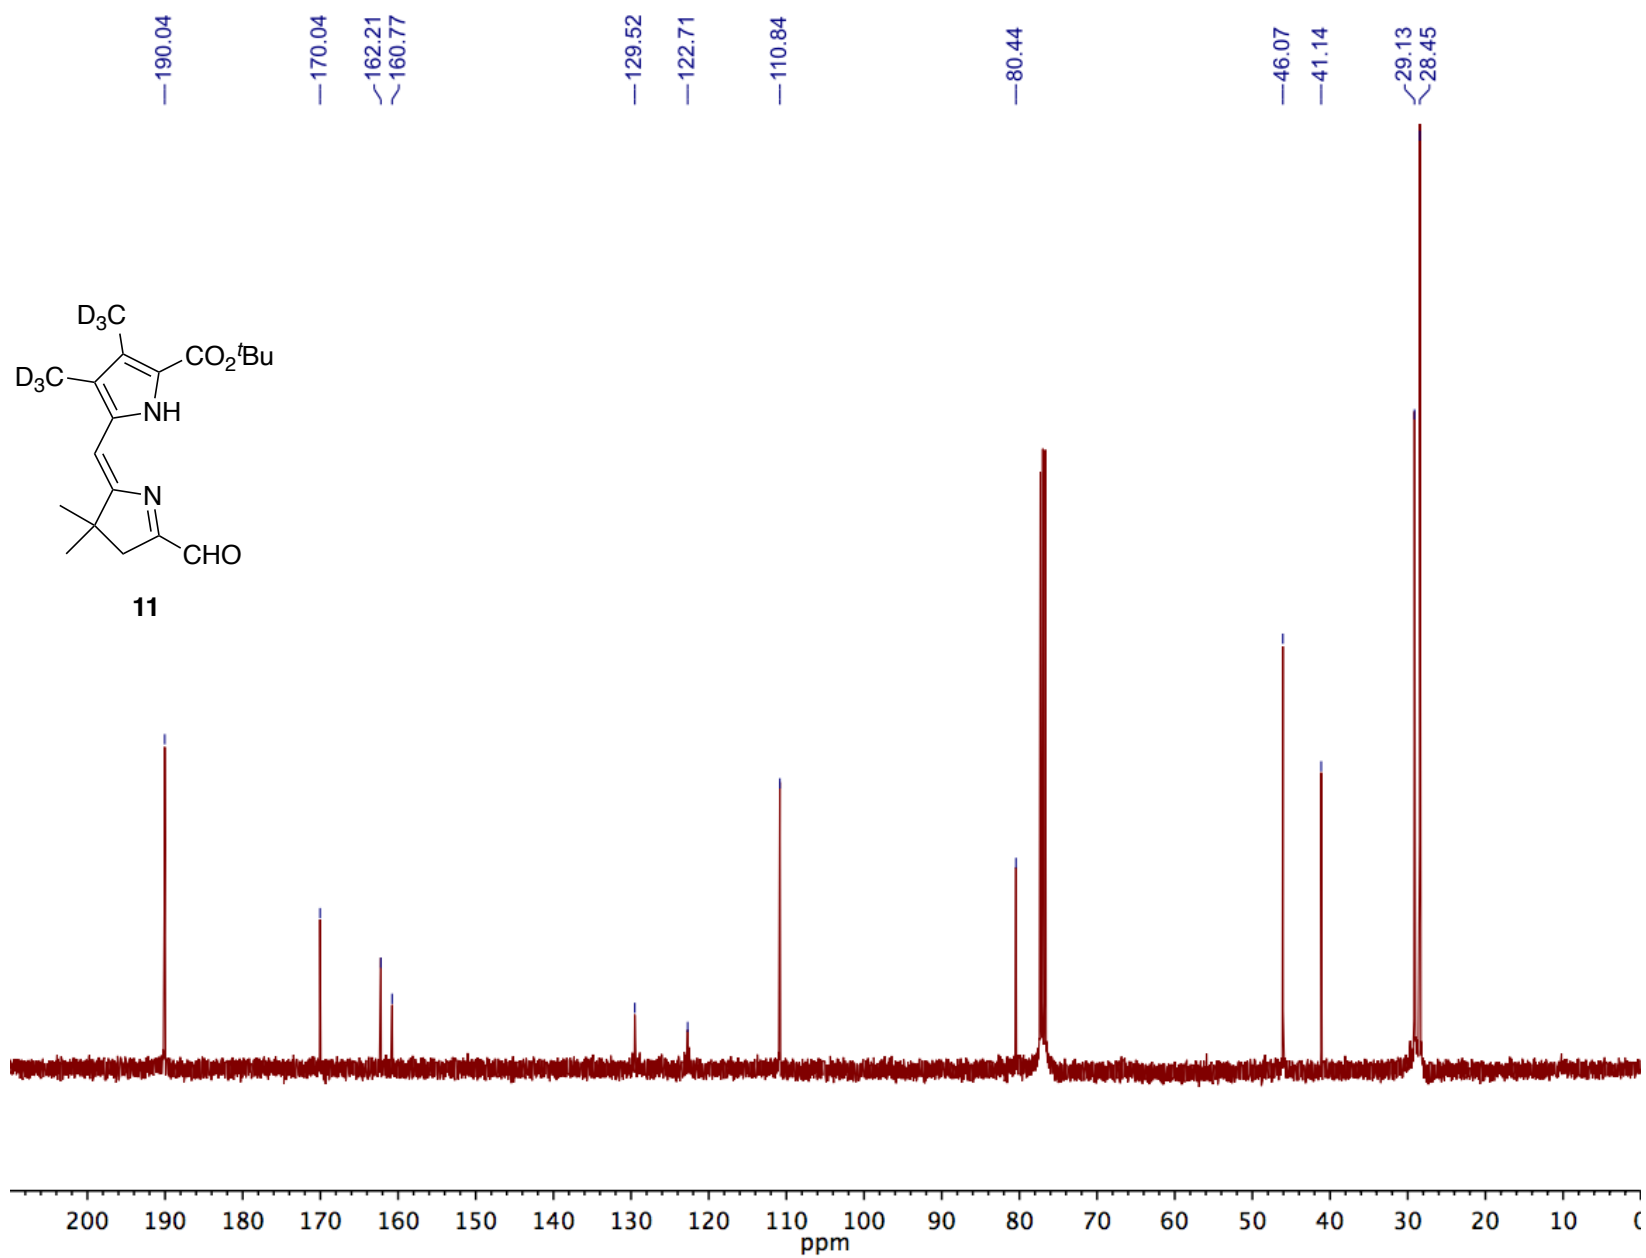



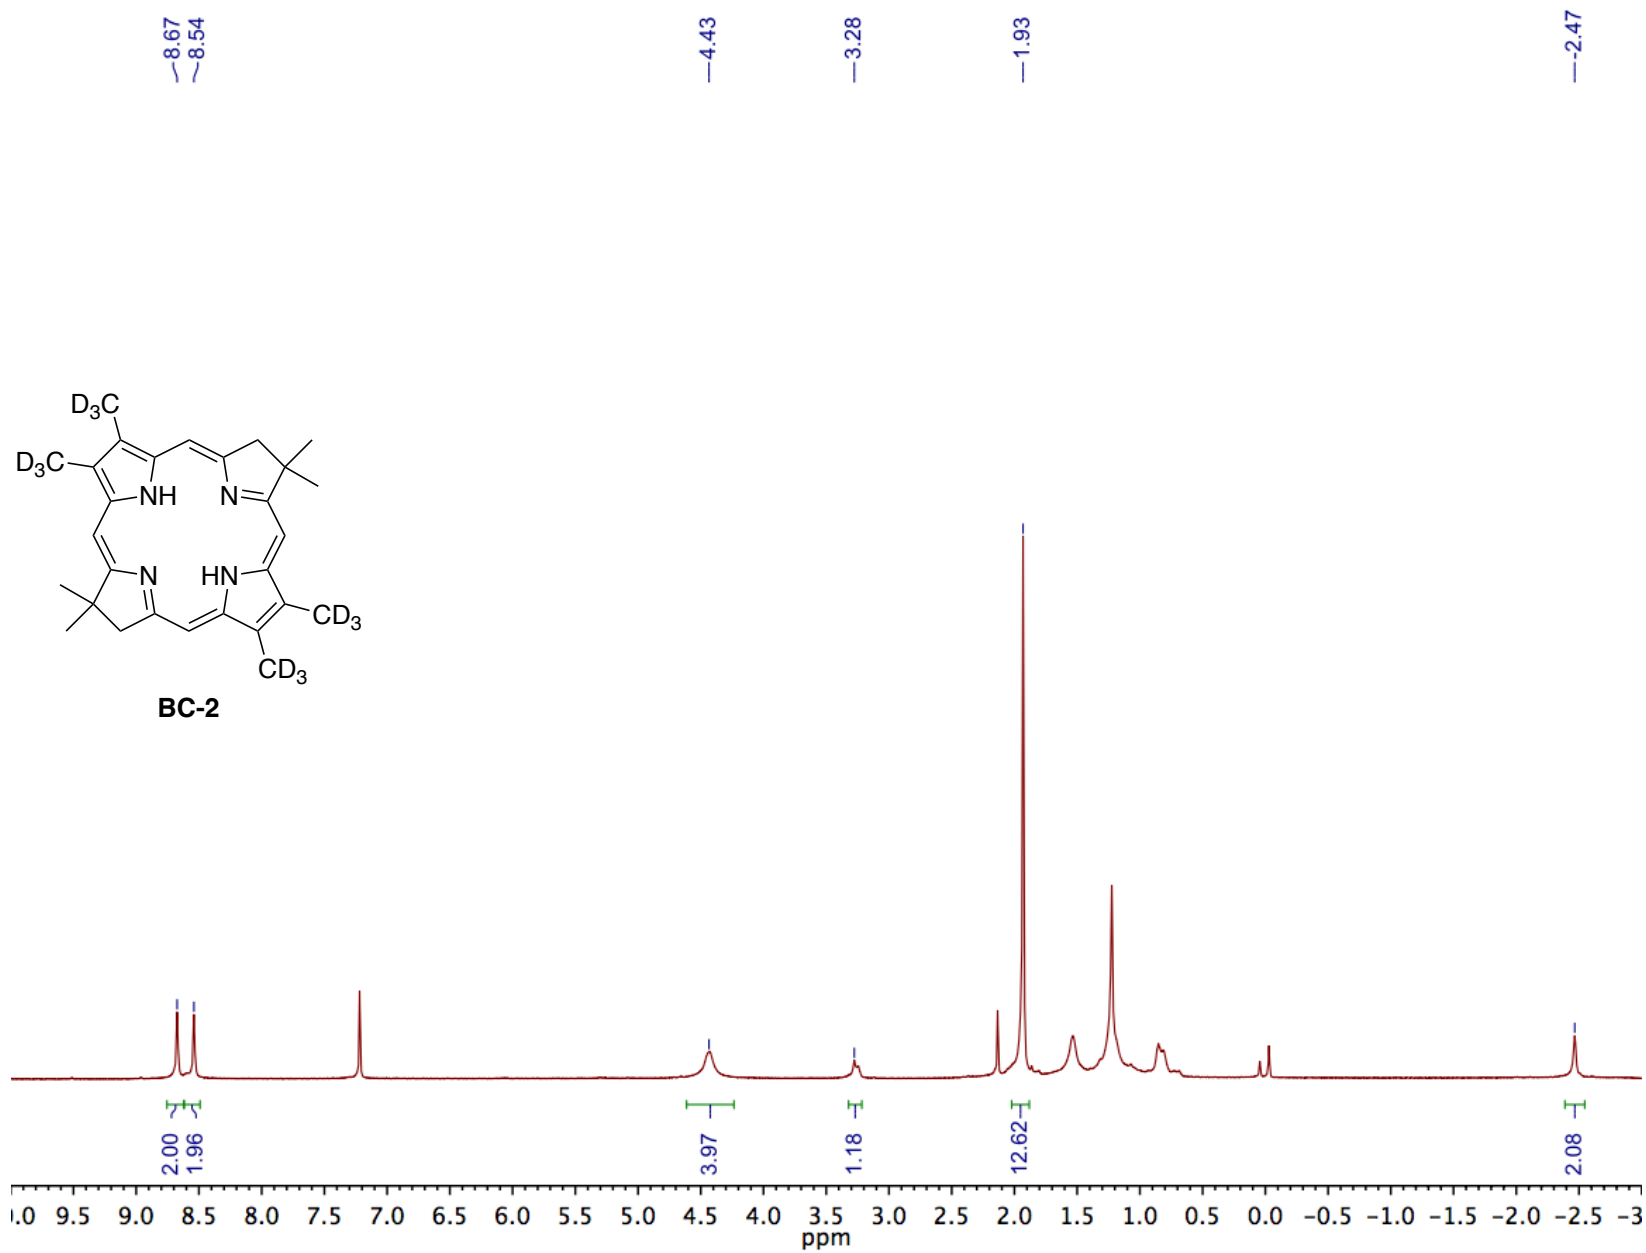

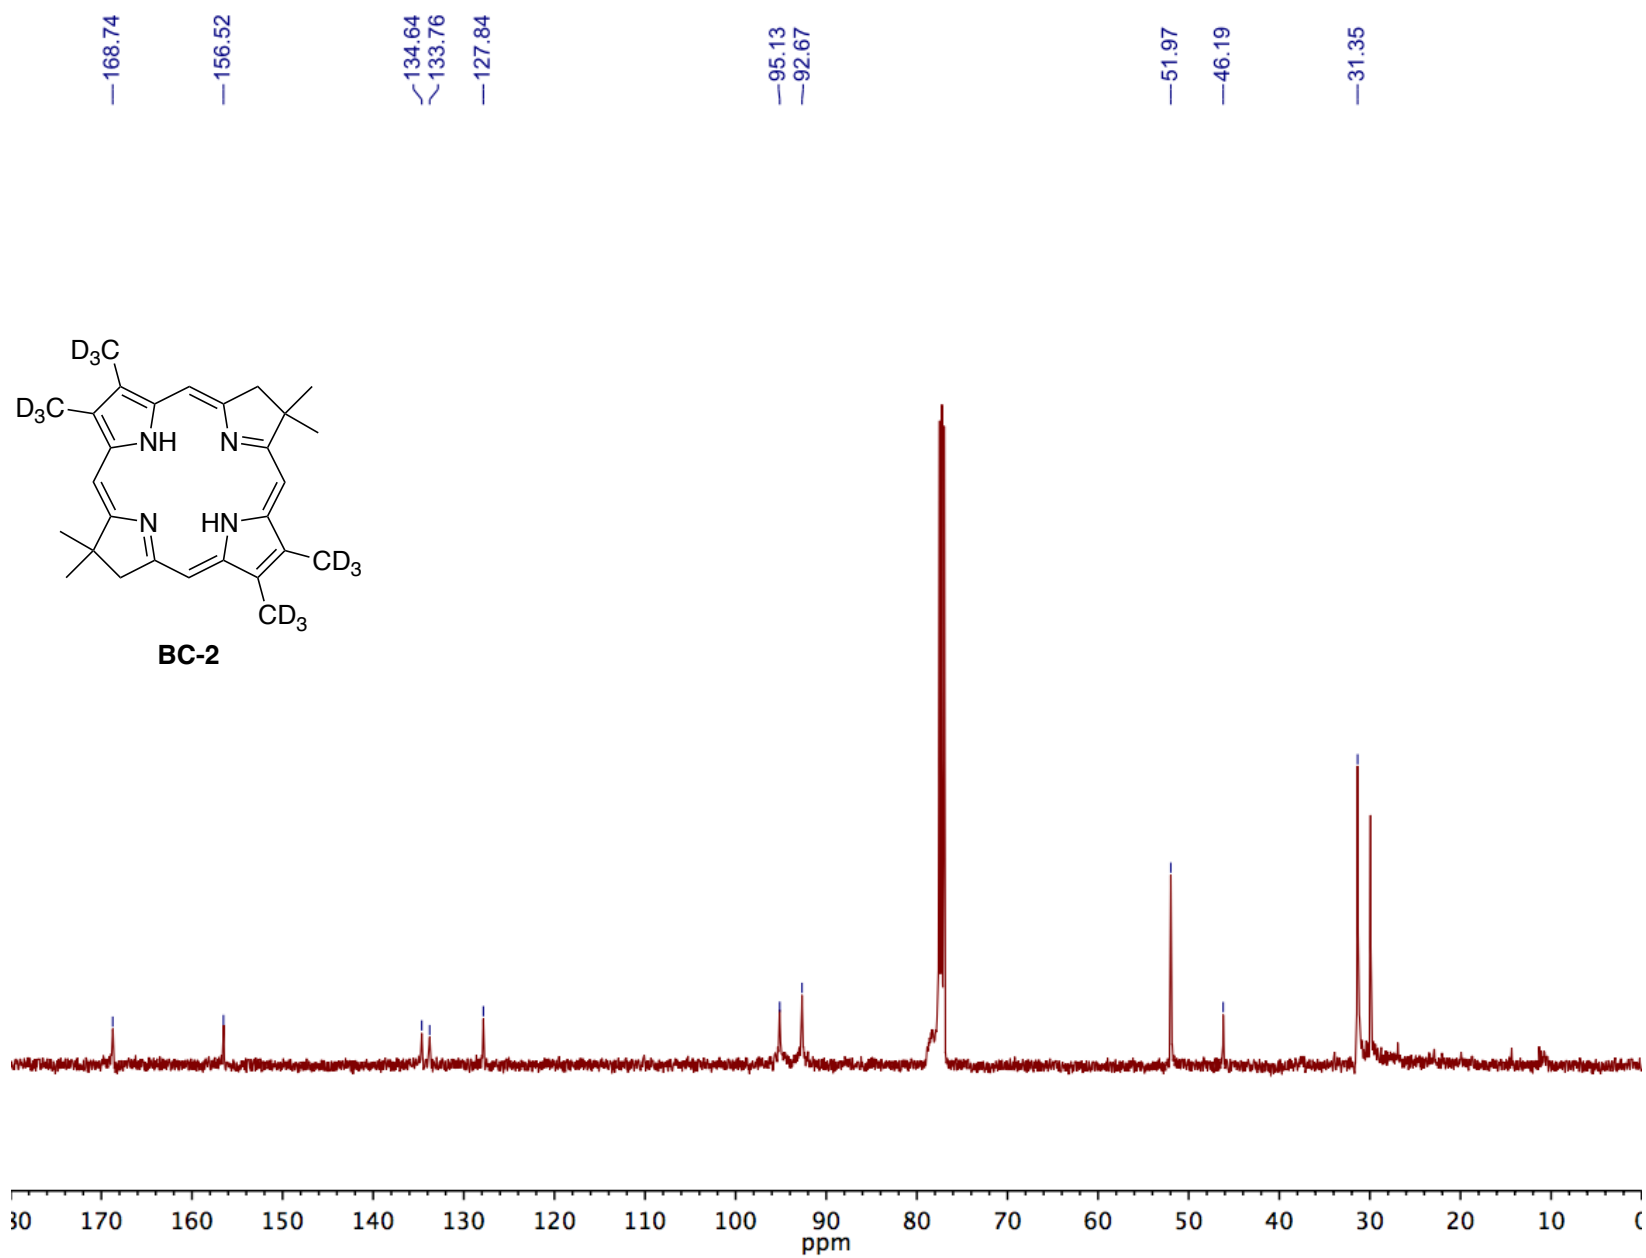

Supplement: s1 [file s1]
